# Supplementary material for: Morphology-controlled self-assembly of an amphiphilic perylenetetracarboxylic diimide dimer-based semiconductor: from flower clusters to hollow spheres
Source: Royal Society of Chemistry journal article supplement (doi:10.1039/c5nj00837a), 2015-01-01
Supplement: c5nj00837a1.pdf [file c5nj00837a1.pdf]

# **Morphology controlled self-assembly of an amphiphilic perylenetetracarboxylic diimide dimer-based semiconductor: from flower clusters to hollow spheres**

Liuqun Xu<sup>a</sup>, Dameng Gao<sup>a</sup>, Jingang Song<sup>b</sup>, Li Shen<sup>c</sup>, Wenmiao Chen<sup>b</sup>, Yanli Chen<sup>a,c,\*</sup>, Shuxiang Zhang<sup>a,\*</sup>

<sup>a</sup>*Shandong Provincial Key Laboratory of Fluorine Chemistry and Chemical Materials, School of Chemistry and Chemical Engineering, University of Jinan, Jinan 250022, China*

<sup>b</sup>*Department of Chemistry, Shandong University, Jinan 250100, China*

<sup>c</sup>*School of Science, China University of Petroleum, Qingdao 266580, China.*

---

*\* Corresponding authors. Tel.: +86 (0)531 8973 6150, Fax: +86(0)531 8276 5969.*

*E-mail address: [chm\\_chenyl@ujn.edu.cn](mailto:chm_chenyl@ujn.edu.cn); (Y. Chen), [chm\\_zhangsx@ujn.edu.cn](mailto:chm_zhangsx@ujn.edu.cn), (S. Zhang)*

**Table S1** Peak positions of absorption ( $\lambda_{\text{abs}}$ ) for **2PDIF-TAZ** in THF and the self-assembled **2PDIF-TAZ** micro-flower clusters, micro-bowknots, and nano-hollow spheres dispersed in water.

| <b>2PDIF-TAZ</b> | $\lambda_{\text{abs}}$ (nm) |                 |               |                |
|------------------|-----------------------------|-----------------|---------------|----------------|
|                  | THF solution                | Flower clusters | Bowknots      | Hollow spheres |
|                  | 445, 533, 573               | 476, 565, 621   | 479, 566, 634 | 466, 557, 607  |

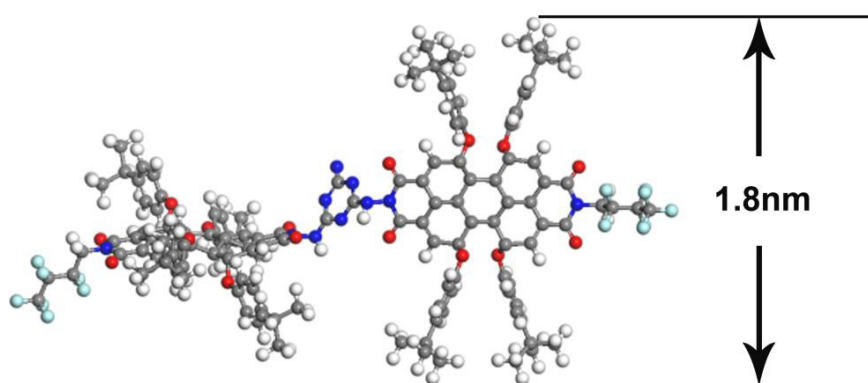

**Fig. S1** Energy-minimized molecular structure of **2PDIF-TAZ**.

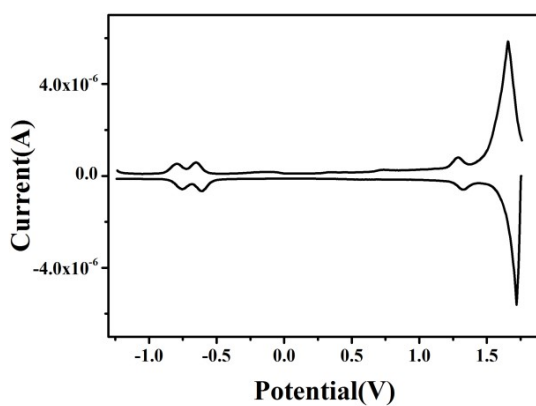

**Fig. S2** Differential pulse voltammogram (DPV) of **2PDIF-TAZ** in  $\text{CH}_2\text{Cl}_2$  containing 0.1 M  $[\text{NBu}_4][\text{ClO}_4]$  at a scan rate of  $10 \text{ mV s}^{-1}$ .

**Table S2** Half-wave redox potentials of **2PDIF-TAZ** (V vs SCE) in CH<sub>2</sub>Cl<sub>2</sub> containing 0.1M TBAP and the HOMO, LUMO levels of **2PDIF-TAZ**.

| Compound         | Oxd <sub>2</sub> /V | Oxd <sub>1</sub> /V | Red <sub>1</sub> /V | Red <sub>2</sub> /V | E <sub>HOMO</sub> /eV <sup>[a]</sup> | E <sub>LUMO</sub> /eV <sup>[a]</sup> |
|------------------|---------------------|---------------------|---------------------|---------------------|--------------------------------------|--------------------------------------|
| <b>2PDIF-TAZ</b> | 1.69                | 1.30                | −0.63               | −0.78               | −5.74                                | −3.81                                |

<sup>[a]</sup> Calculated from empirical formula <sup>1</sup>: HOMO = −(Oxd<sub>1</sub>+4.44 eV); LUMO = −(Red<sub>1</sub>+4.44 eV).

## References

1 Y. Chen, L. Chen, G. Qi, H. Wu, Y. Zhang and L. Xue, *Langmuir*, 2010, 26: 12473.
